# Supplementary material
Source: publisher site journal article supplement (https://www.dovepress.com/article/447887)
Supplement: Supplementary file 1 [file get_supplementary_file.php]

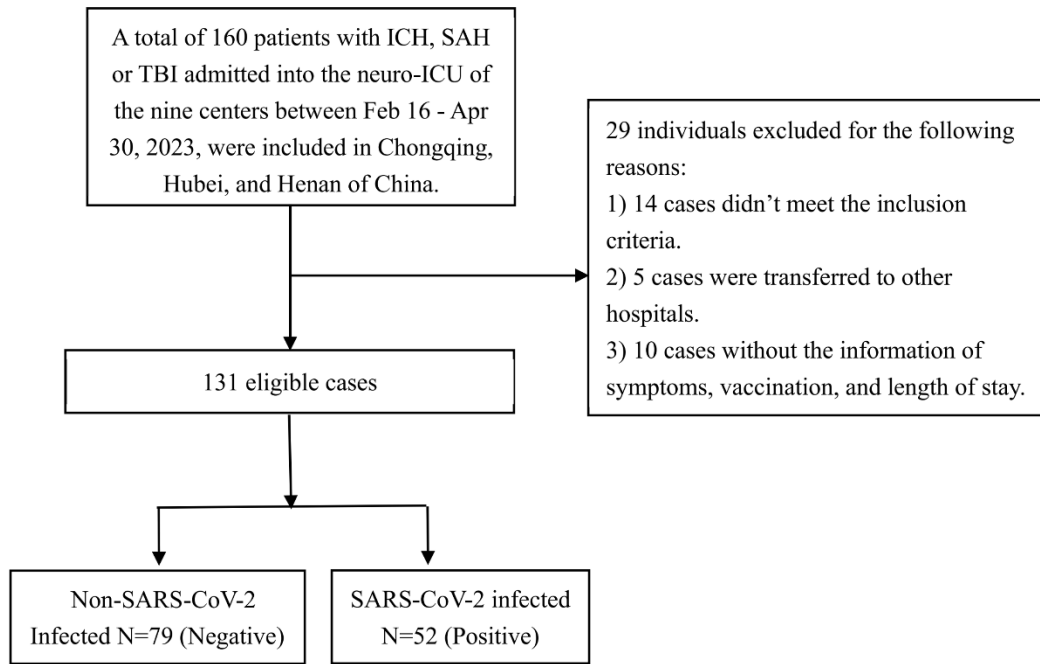

**Fig S1. Study Flow Chart**

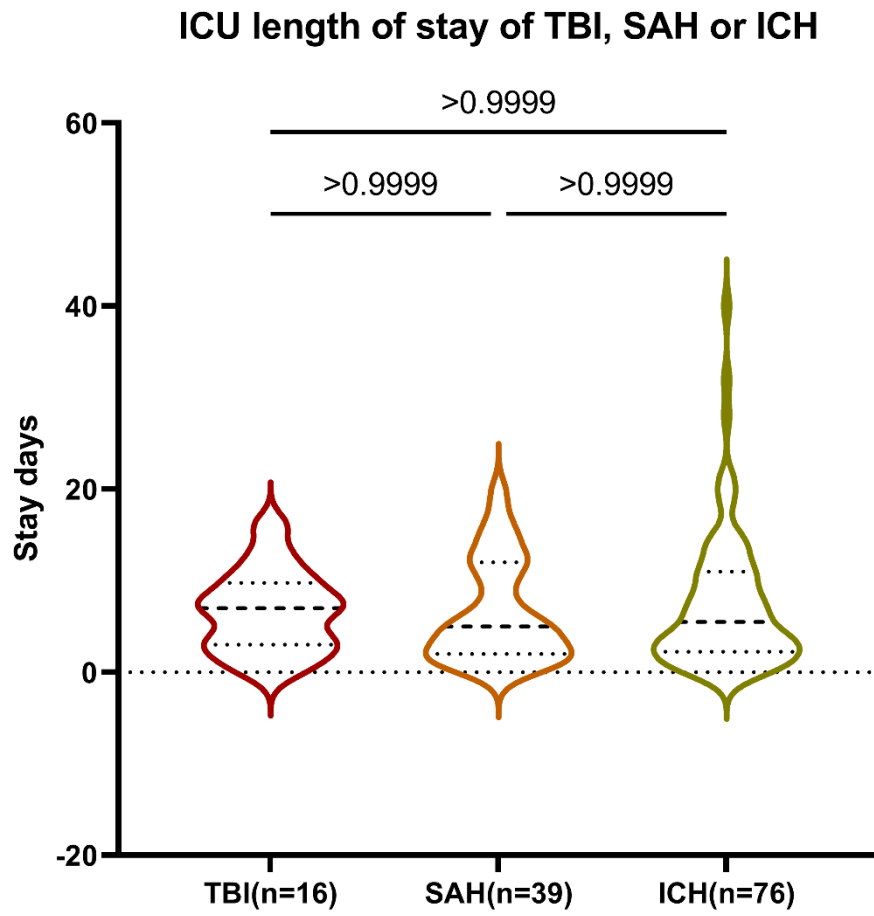

**Fig S2.** The violin plot suggests no significant differences in ICU length of stay among patients with ICH, SAH, and TBI in the present study.

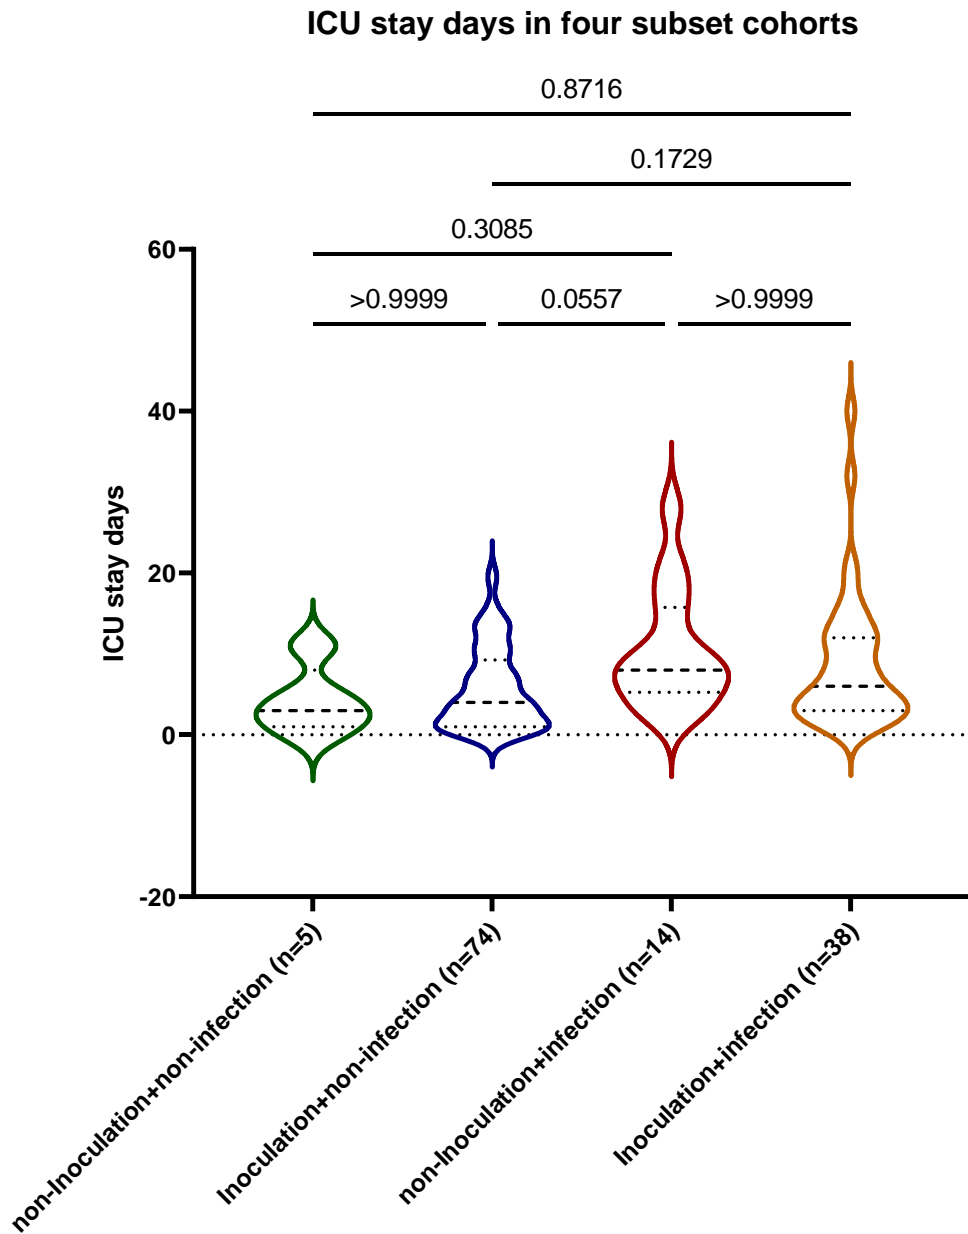

**Fig S3.** The violin plot did not show a significant difference between patients who received the COVID-19 vaccine and those who did not receive the vaccine
